# Supplementary material for: SARS-CoV-2 Subgenomic N (sgN) Transcripts in Oro-Nasopharyngeal Swabs Correlate with the Highest Viral Load, as Evaluated by Five Different Molecular Methods
Source: PubMed Central journal article supplement (PMC7923082; doi:10.3390/diagnostics11020288), 2021-02-12
Supplement: diagnostics-11-00288-s001.pdf [file diagnostics-11-00288-s001.pdf]

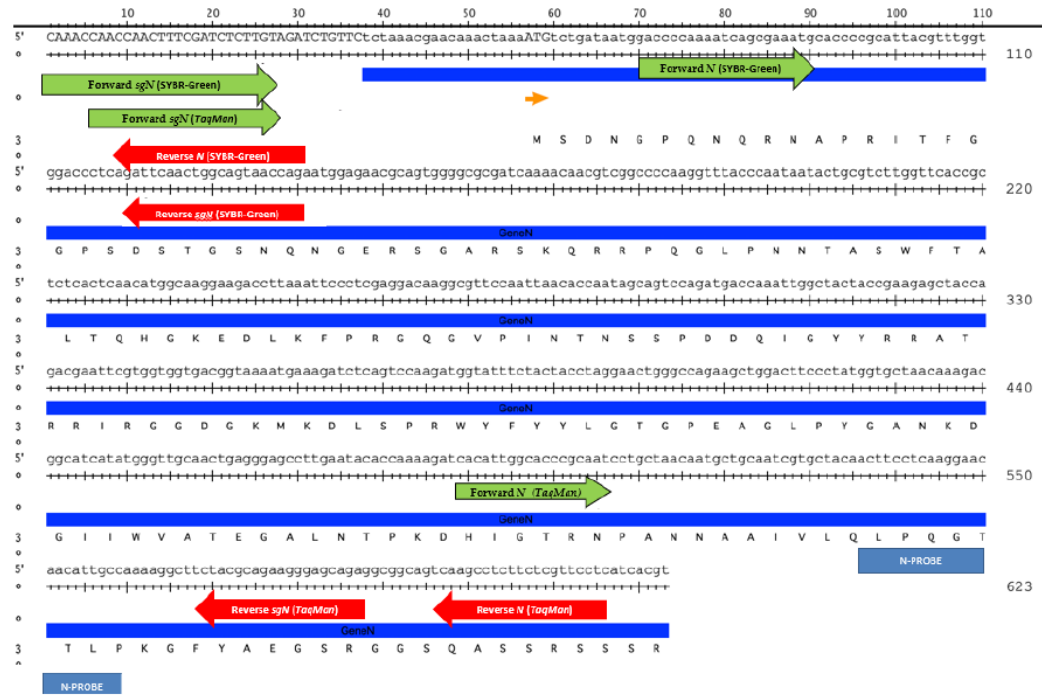

**Figure S1.** Primer setting for *N* gene and *sgN* regions. In green are reported the Forward primers for genomic and subgenomic transcripts of *N* gene. In red, the Reverse ones. In light blue the common probe is indicated.

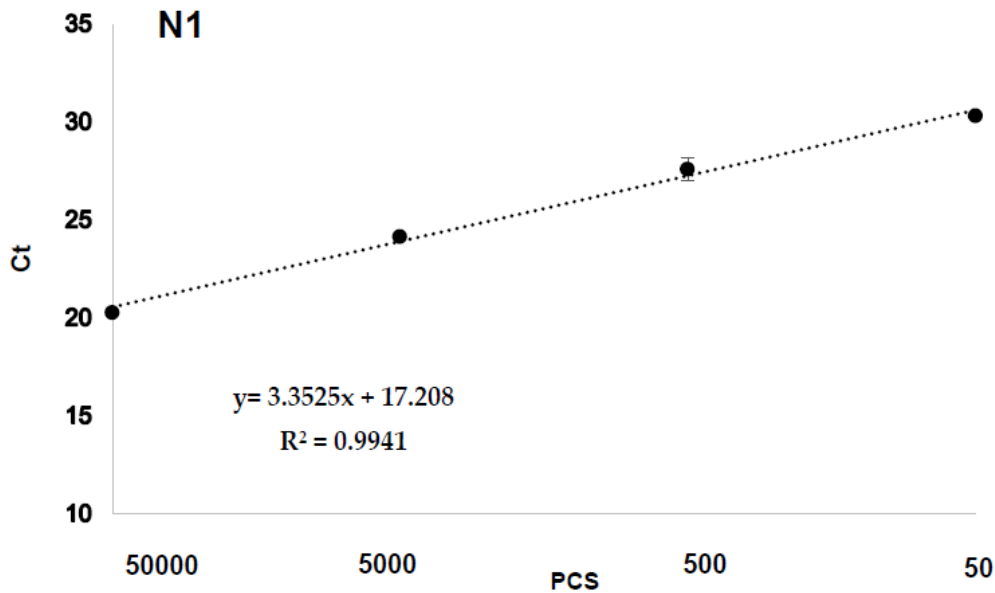

**Figure S2.** Gene *N* regression plot and gene expression values for *sgN* and *sgE*. Standard curve with RNA related to N1 fragment derived from synthetic positive controls (pcs) with a known viral titre (500.000–50). The “Y” axes bar shows threshold cycle (Ct) related to N1 amplification obtained with SYBR Green approach; on the “X” axes RNA serial dilution from Synthetic Positive Control (pcs)

**Table S1 (ST1):** SYBR Green qPCR showing Ct and  $\Delta$ Ct values related to *sgN* and *sgE* transcripts on RNA extracted from Vero E6.

| MOI  | SARS-CoV-2 Infected Vero E6 cells |             |            |             |
|------|-----------------------------------|-------------|------------|-------------|
|      | <i>sgN</i>                        |             | <i>sgE</i> |             |
|      | Ct                                | $\Delta$ Ct | Ct         | $\Delta$ Ct |
| 0.15 | 25.36                             | 8.33        | 30.33      | 13.31       |
| 0.10 | 31.48                             | 12.69       | 35.26      | 16.48       |
| 0.09 | 31.25                             | 11.76       | 34.18      | 14.68       |
| 0.02 | 33.72                             | 15.84       | 36.05      | 18.17       |
| 0.01 | N.D.                              | N.D.        | 39.62      | 22.08       |
| 0.03 | N.D.                              | N.D.        | 36.52      | 18.16       |
| 0.05 | N.D.                              | N.D.        | 36.81      | 17.56       |

Legend Table ST1: qPCR with SYBR Green approach showing Ct and  $\Delta$ Ct values related to *sgN* and *sgE* transcripts on reverse transcribed RNA extracted from Vero E6 cells infected with SARS-CoV-2 at different Multiplicity of Infection (MOI).  $\Delta$ Ct values were calculated by using b-Actin as housekeeping gene.

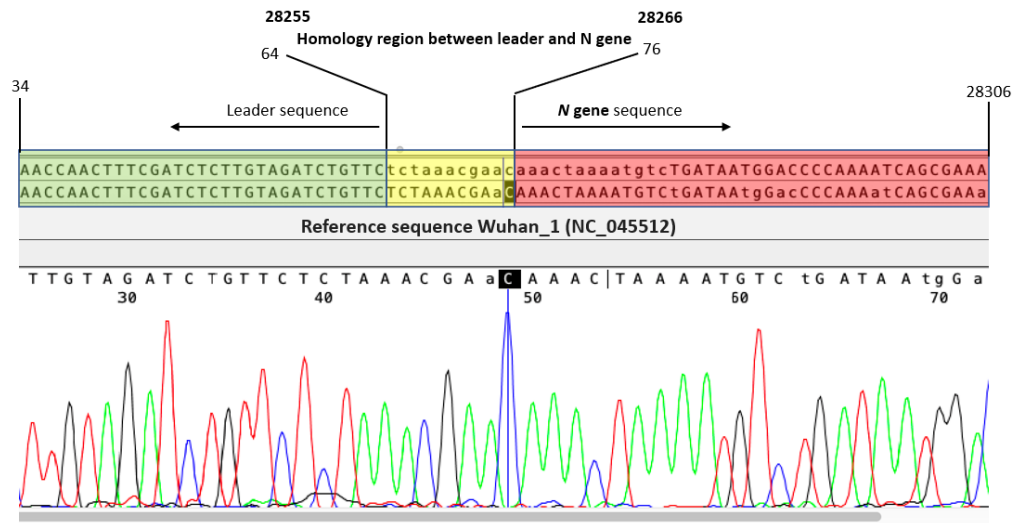

**Figure S3.** Sanger sequencing of *N* subgenomic region of SARS-CoV-2. The primer pair that recognizes sequences on the virus genome 28331 nucleotides distant, when used to amplify cDNA from swabs, produces a PCR amplicon of 141 bp. The region of homology between the leader and *N* gene is highlighted in yellow [15]. The arrows highlight the fusion between the leader and *N* gene sequences, respectively. The Sanger sequencing of this PCR product results in the *sgN* sequence.
